# Supplementary material for: Synthesis of molecular imprinted polymer coated photocatalysts with high selectivity
Source: Royal Society of Chemistry journal article supplement (doi:10.1039/b615303h), 2007-01-01
Supplement: b615303h.pdf [file b615303h.pdf]

## Electronic Supplementary Information

290

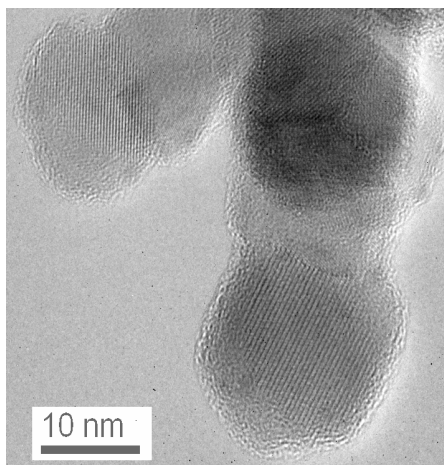

**Fig. S1** TEM image of MIP-coated TiO<sub>2</sub> (4CP-P25) particles (obtained on a JEM-2010FEF TEM).

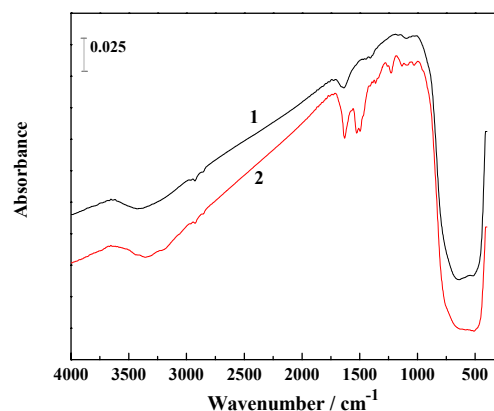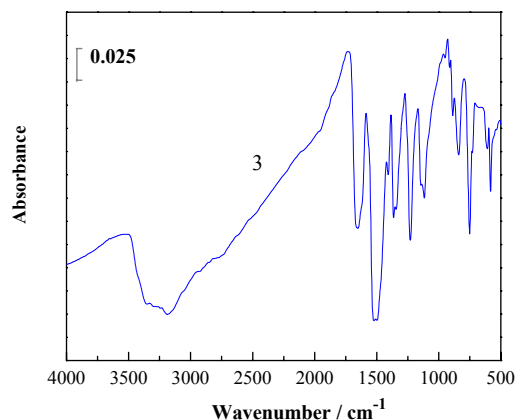

**Fig. S3** FTIR spectra of P25 (1), 4CP-P25 (2) particles, and the polymer of OPDA (3) detected on a Bruker VERTEX 70 spectrophotometer. The MIP layer here was somewhat thicker than that required in practice, in order to clear show the absorption bands of the MIP layer.

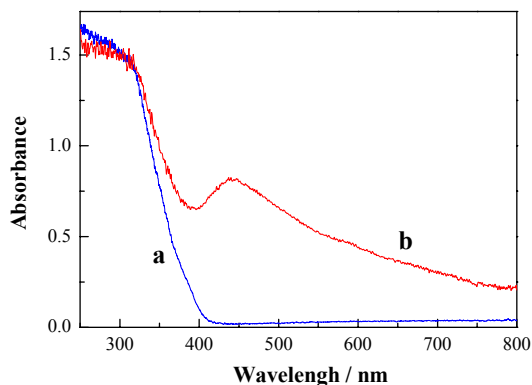

**Fig. S2** UV-visible absorption spectra of P25 (a) and 4CP-P25 (b) particles. The spectra were detected on a Shimadzu UV-2550 spectrophotometer. It is easily seen that the MIP layer yielded absorption in the visible region with a maximum absorption at about 440 nm, which is attributed to the coated polymer of *o*-phenylenediamine.

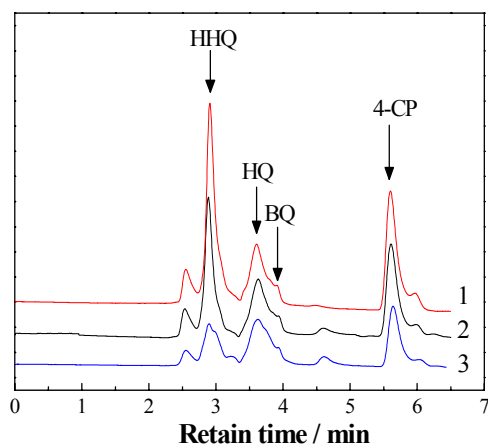

**Fig. S4** HPLC diagrams of 4CP solutions ( $c_0 = 184.3 \mu\text{mol L}^{-1}$ ) after an UV light illuminating for 37.5 min in the absence of any photocatalyst (1), in the presence of P25 (2) and 4CP-P25 (3) as photocatalyst. The remained concentration of 4CP was determined as 77.6, 60.0, and 39.2  $\mu\text{mol L}^{-1}$  for curves 1, 2 and 3, respectively. The main aromatic intermediates include HHQ (2-hydroxy-1,4-benzoquinone), HQ (1,4-hydroquinone) and BQ (1,4-benzoquinone).

295

300

305

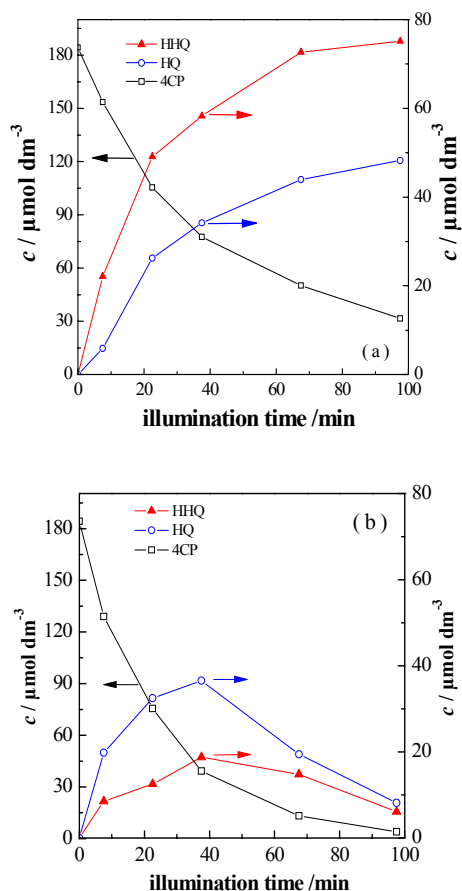

**Fig. S5** Variations of main aromatic intermediates during the direct photolysis of 4CP (a) and the photocatalytic degradation of 4CP over 4CP-P25 (b).

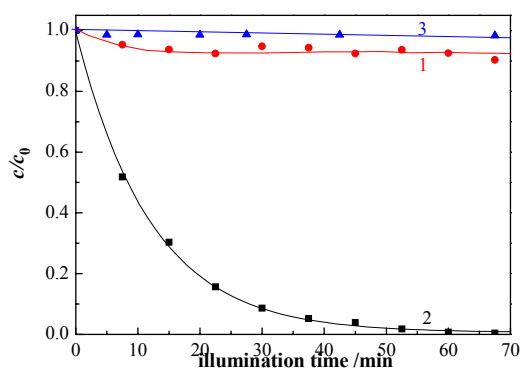

**Fig. S6** Degradation kinetics for 4CP during the degradation in the mixtures of 4CP and phenol ( $c_0 = 2 \text{ mg L}^{-1}$  for 4CP and  $500 \text{ mg L}^{-1}$  for phenol) under UV light illumination in the absence (1) and presence (2) of 4CP-P25 as photocatalyst. Curve 3 gave the variation of 4CP concentration in the presence of 4CP-P25 under dark, which indicated that the adsorption of 4CP on the surface of the photocatalyst 4CP-P25 did not influence the decrease of 4CP concentration.
